# Supplementary material
Source: PubMed Central journal article supplement (PMC2846699)
Supplement: NIHMS40132-supplement-01.pdf [file NIHMS40132-supplement-01.pdf]

# Comparison of neurofibroma models

|                                                 | <u><i>Nf1flox/flox;DhhCre</i></u>                            | <u><i>Nf1flox/flox;Krox20-Cre</i></u>           |
|-------------------------------------------------|--------------------------------------------------------------|-------------------------------------------------|
| <b>Strain</b>                                   | I129/BL/6 X FVBN rederived on CD1                            | I129/BL/6                                       |
| <b>Promoter expression</b>                      | Late boundary cap (E12.5)<br>Nerve derived precursor*(E12.5) | Early boundary cap (E10.5)<br>Mature SC (E15.5) |
| <b>Mouse survival</b>                           | 5-13 months                                                  | 12-16 months                                    |
| <b>Environment</b>                              | Wild type                                                    | <i>Nf1</i> +/-                                  |
| <b>Nerve enlargement</b>                        | Yes<br>Evidenced by P15                                      | Yes<br>Evidenced by 12 months                   |
| <b>Plexiform neurofibroma location and size</b> | Yes, spinal roots up to 11mm                                 | Yes, spinal roots and cranial nerve 1-2mm       |
| <b>Dermal neurofibroma</b>                      | Yes (46.4%)                                                  | No                                              |
| <b>Pigmentation</b>                             | Yes (39.3%)                                                  | No                                              |

\* Variously called Schwann cell precursor ( Jessen and Mirsky, 2005 ) or neural crest stem cell (Joseph et al, 2004)
